# Supplementary material for: A highly stable multifunctional aptamer for enhancing antitumor immunity against hepatocellular carcinoma by blocking dual immune checkpoints
Source: Royal Society of Chemistry journal article supplement (doi:10.1039/d0bm02210a), 2021-01-01
Supplement: d0bm02210a1.pdf [file d0bm02210a1.pdf]

## Electronic Supplementary Information

### Highly stable multifunctional aptamer for enhancing antitumor immunity to against hepatocellular carcinoma by blocking dual immune checkpoint

Yanlin Du,<sup>a,b,c,#</sup> Da Zhang,<sup>a,#</sup> Yiru Wang,<sup>d</sup> Ming Wu,<sup>a</sup> Cuilin Zhang,<sup>a</sup> Youshi Zheng,<sup>a</sup> Aixian Zheng,<sup>a,\*</sup> Xiaolong Liu<sup>a,b\*</sup>

<sup>a</sup>The United Innovation of Mengchao Hepatobiliary Technology Key Laboratory of Fujian Province, Mengchao Hepatobiliary Hospital of Fujian Medical University, Fuzhou 350025, P. R. China;

<sup>b</sup>Fujian Institute of Research on The Structure of Matter, Chinese Academy of Sciences, Fuzhou 350002, P. R. China;

<sup>c</sup>College of Life Science, Fujian Agriculture and Forestry University, Fuzhou 350002, P. R. China;

<sup>d</sup>College of Biological Science and Engineering, Fuzhou University, Fuzhou 350116, P. R. China.

#These authors contributed equally to this work.

\*Corresponding authors. E-mail: zax040500273@126.com; xiaoloong.liu@gmail.com

|              |                                                                                                                                                         |
|--------------|---------------------------------------------------------------------------------------------------------------------------------------------------------|
| PD-L1-apt    | ACGGGCCACATCAACTCATTGATAGACAATGCGTCC<br>ACTGCCCGT                                                                                                       |
| CTLA-4-apt   | TCCCTACGGCGCTAACGATGGTGAAAATGGGCCTAGGG<br>TGGACGGTGCCACCGTGCTACAAC                                                                                      |
| P1/C4-bi-apt | 5'P_GAGACGGGCCACATCAACTCATTGATAGACAATGCG<br>TCCACTGCCCGTCTCGCTCAGGTTCCTACGGCGCTAA<br>CGATGGTGAAAATGGGCCTAGGGTGGACGGTGCCACC<br>GTGCTACAACACCTGAGC-3'OH   |
| P1-apt       | 5'P_GAGACGGGCCACATCAACTCATTGATAGACAATGCG<br>TCCACTGCCCGTCTCGCTCAGGTAAAAAAAAAAAAAAAAA<br>AAAAAAAAAAAAAAAAAAAAAAAAAAAAAAAAAAAAAAAAA<br>AAAAAACCTGAGC-3'OH |
| C4-apt       | 5'P_GAGACGGGCAAAAAAAAAAAAAAAAAAAAAAAAAAAA<br>AAAAAAGCCCGTCTCGCTCAGGTTCCTACGGCGCTAA<br>CGATGGTGAAAATGGGCCTAGGGTGGACGGTGCCACC<br>GTGCTACAACACCTGAGC-3'OH  |

**Table S1. The sequences of the oligonucleotides used in this paper.** The letters in red represent the auxiliary sequences at the junction of PD-L1 aptamer and CTLA-4 aptamer to form a gapped double-stranded bridge structure. P1-apt and C4-apt were utilized as control aptamers that can bind to PD-L1-positive tumor cells and CTLA-4-positive T cells, respectively.

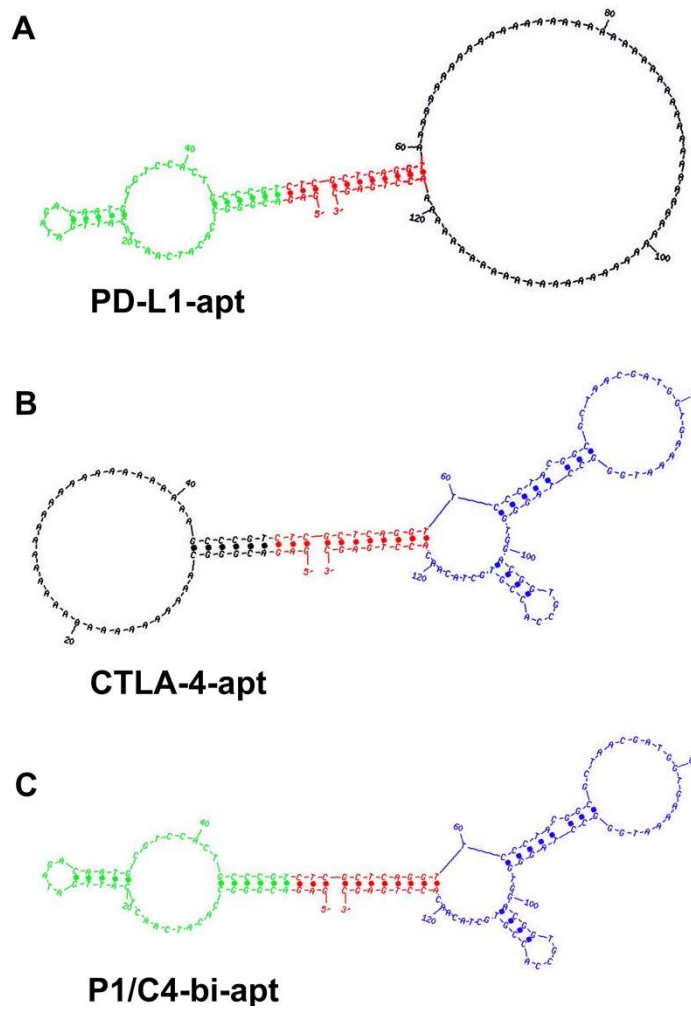

**Fig. S1. The predicted structures of the oligonucleotides used in this paper.** The letters in green represent the sequences of PD-L1 aptamer, and the letters in blue represent the sequences of CTLA-4 aptamer.

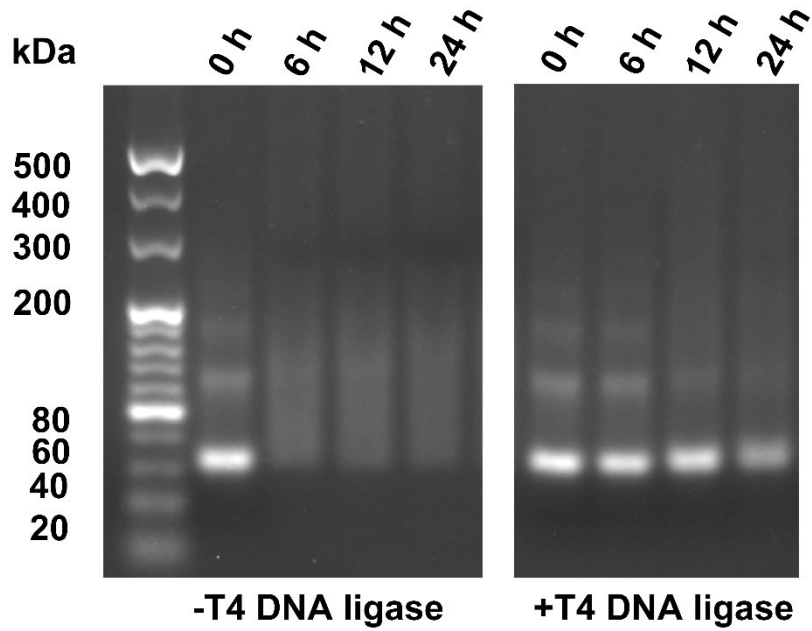

**Fig. S2. The stability of P1/C4-bi-apt in murine serum.** 2% agarose gel electrophoresis determination of (left) uncyclized P1/C4-bi-apt and (right) cyclized P1/C4-bi-apt dispersed in 10% murine serum at 37 °C for 0 h, 6 h, 12 h and 24 h.

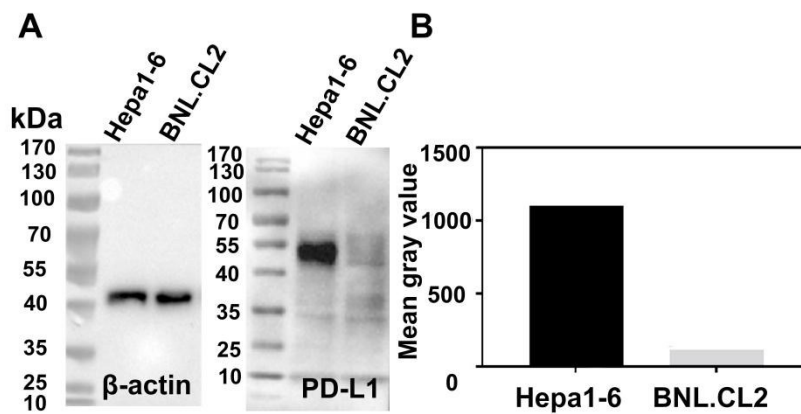

**Fig. S3. The PD-L1 expression of different cell lines.** (A) The expression of PD-L1 on Hepa1-6 cells and BNL.CL2 cells determined by Western blot. (B) Quantification of PD-L1 expression of Hepa1-6 cells and BNL.CL2 cells by using Image J.

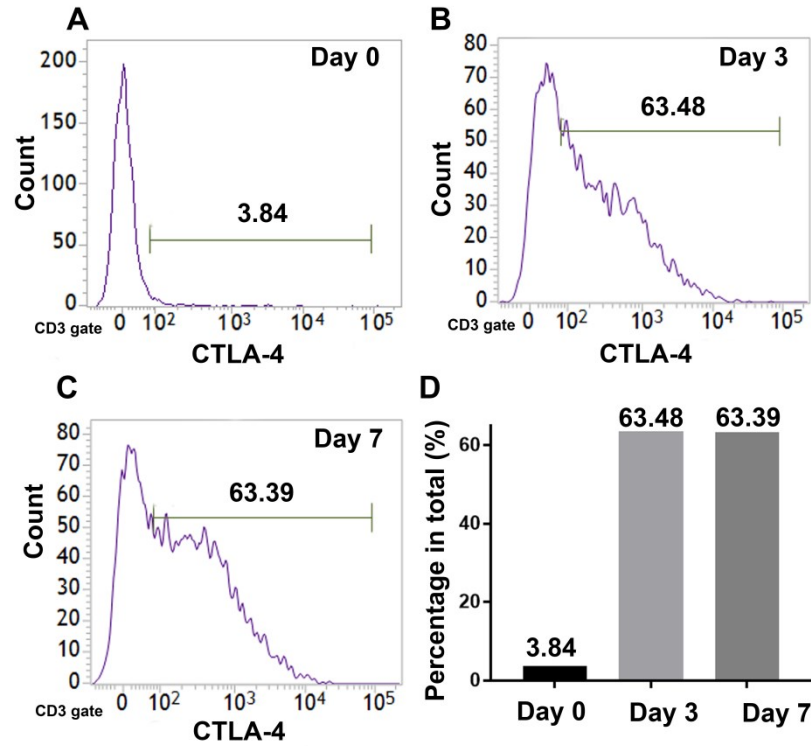

**Fig. S4. The proportion of CTLA-4-positive T cells in activated PBMCs.** (A) Representative FACS gating strategy for detecting the percentage of CTLA-4-positive cells in non-activated T cells (without anti-CD3/CD28 antibody activation), which are gated on CD3<sup>+</sup> T cells. The percentage of CTLA-4-positive cells in T cells at 3 days (B) and 7 days (C) post-activation. The above data are all gated on CD3<sup>+</sup> T cells. (D) The percentage of CTLA-4 at different time in total cells, analyzed by flow cytometry.

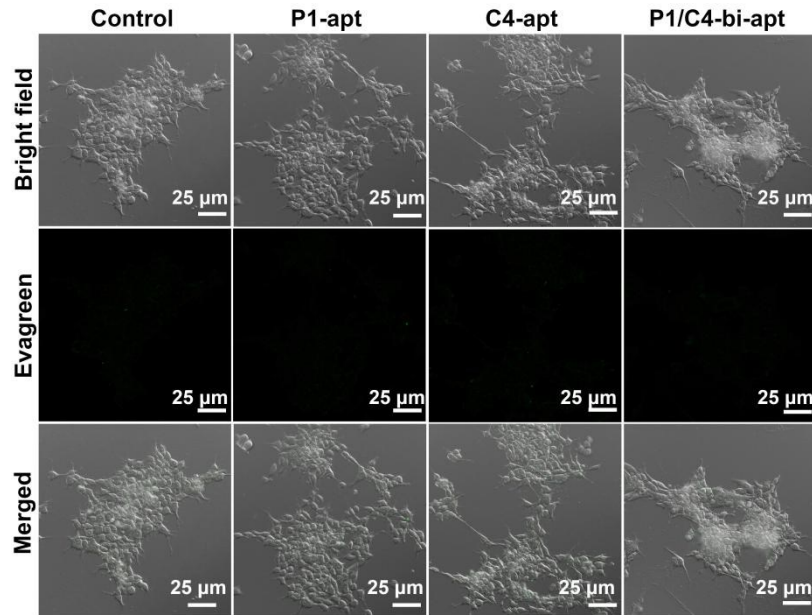

**Fig. S5. The binding ability of different aptamers to PD-L1 low-expressed BNL.CL2 cell line.** Confocal laser scanning microscopy (CLSM) images of BNL.CL2 cells incubated with Evagreen labeled P1-apt, C4-apt or P1/C4-bi-apt. BNL.CL2 cells without any treatment were experimented as control. Scale bar, 50  $\mu\text{m}$ . (Evagreen excited by 488 nm)

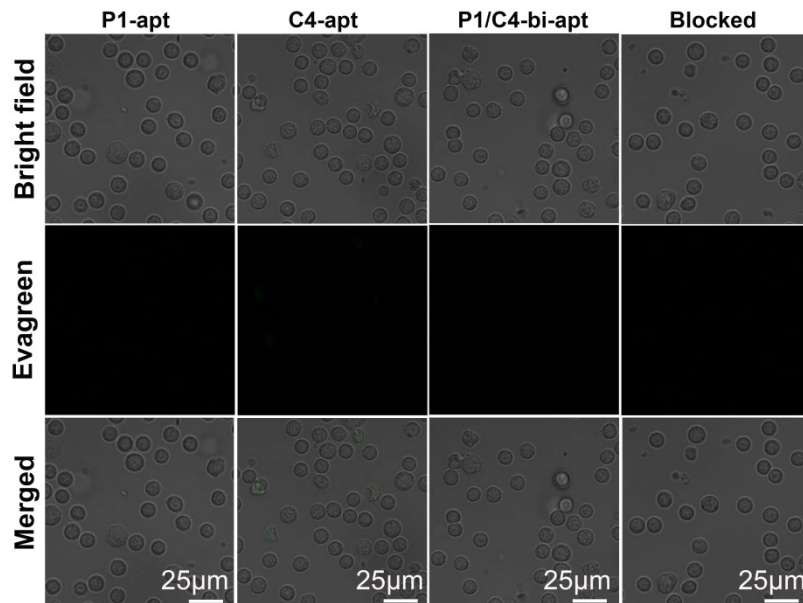

**Fig. S6. The binding ability of different aptamers to CTLA-4-negative T cells.** Confocal laser scanning microscopy (CLSM) images of T cells incubated with Evagreen labeled P1-apt, C4-apt, P1/C4-bi-apt or pretreated with anti-CTLA-4 antibody before added with P1/C4-bi-apt. Scale bar, 25  $\mu\text{m}$ . (Evagreen excited by 488 nm)

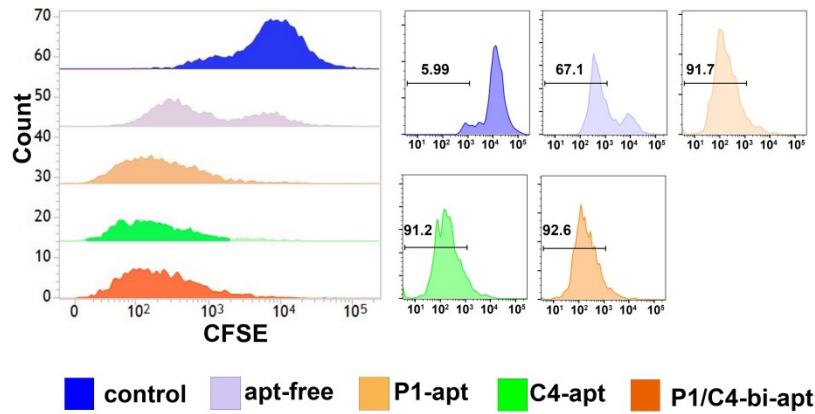

**Fig. S7. Proliferation of mouse lymphocytes measured by CFSE assay.** Flow cytometry analysis of CFSE-labeled allogeneic mouse lymphocytes after 72 h treatments (aptamer-free, P1-apt, C4-apt and P1/C4-bi-apt). The cells without any treatment were experimented as control. CFSE intensity was measured by flow cytometry on the gated CD3<sup>+</sup> population.

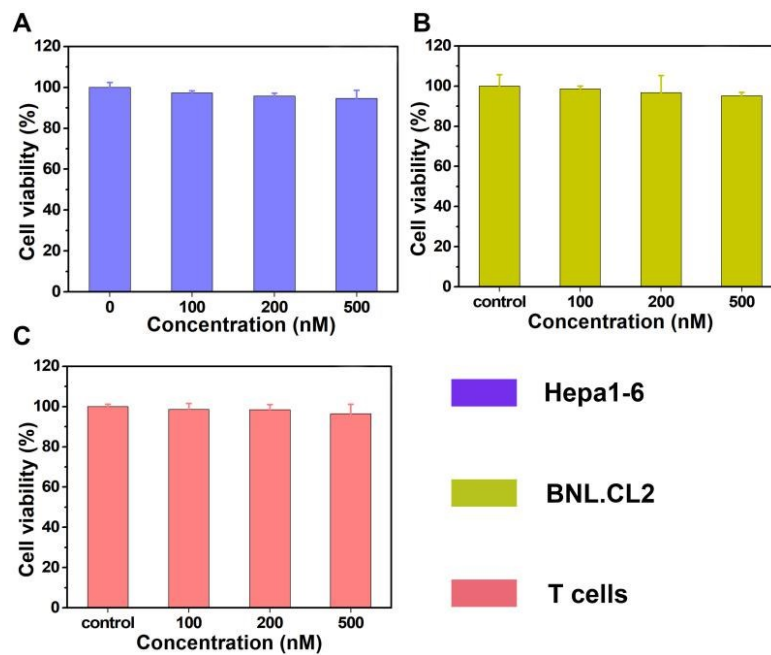

**Fig. S8. Cytotoxicity evaluation of P1/C4-bi-apt by CCK-8 assay.** Different cell lines including Hepa1-6 (tumor cell line) (A), BNL.CL2 (normal cell line) (B) and T cells (C) were treated with varying concentration of P1/C4-bi-apt for 24 h, and cell viability was detected with CCK-8. The results are the mean  $\pm$  SD (n = 5).



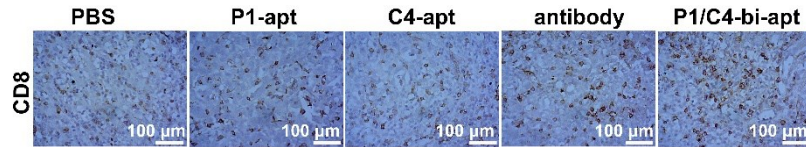

**Fig. S9. The tumor-infiltrating T lymphocytes in tumors of different groups.** Immunohistochemistry staining of tumor tissue slices to analyze the tumor-infiltrating lymphocytes, as determined by optical microscope. Scar bar is 100 μm.

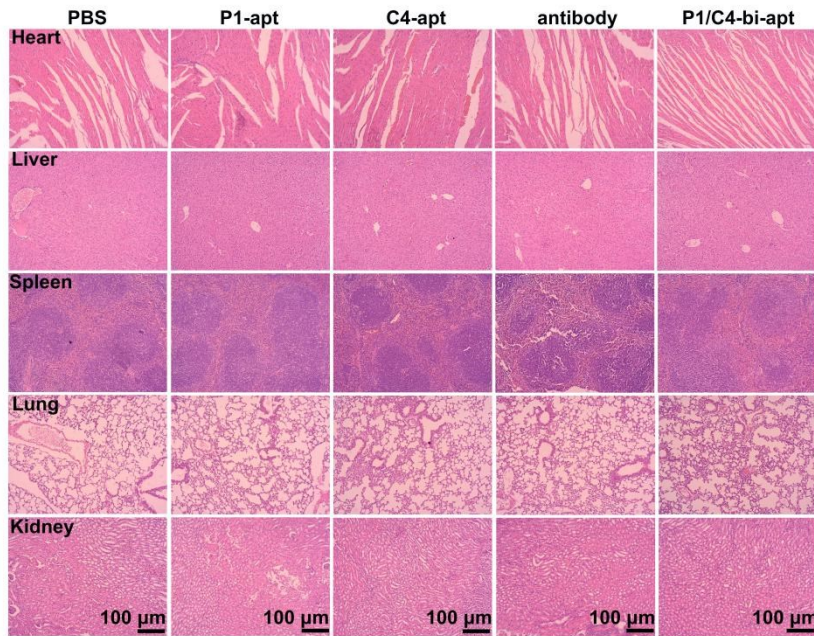

**Fig. S10. Immunohistochemical analysis of major organs in tumor-bearing mice.** Pathological changes in major organs (heart, liver, spleen, lung, kidney) evaluated by H&E staining at 3 days post-last treatment. Scar bar is 100 μm.



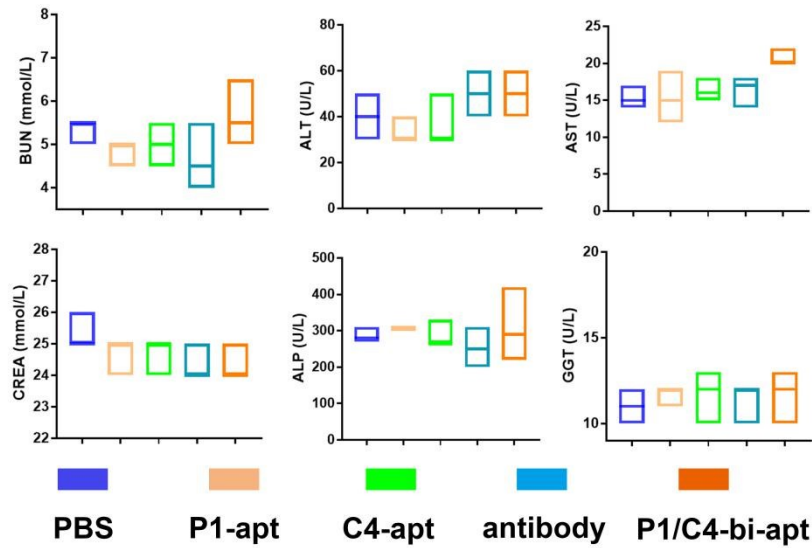

**Fig. S11. Serum biochemical indicators of tumor-bearing mice after different treatment.** Blood biochemistry analysis of liver, kidney and cardiac function markers after intravenous injection with PBS, P1-apt, C4-apt, anti-PD-L1 antibody and P1/C4-bi-apt. Data are present as the mean  $\pm$  SD (n = 3).
